# Supplementary material
Source: Springer Nature journal article supplement (https://www.springermedizin.de/resource/supplementary/12889_2013_6866_MOESM1_ESM.pdf/9498986)
Supplement: MOESM1 [file 9498986]

**Parental perceived neighborhood built environmental attributes:**

- residential density
- land use mix diversity
- distance to school
- land use mix access
- connectivity
- availability of walking and cycling infrastructure
- maintenance and quality of walking and cycling infrastructure
- safety for traffic
- safety for crime
- convenience of recreational facilities

$\tau$

**Physical activity variables:**

- active transport to and from school
- walking for transport during leisure time
- cycling for transport during leisure time
- total physical activity level
- daily number of step counts

**Parental perceived neighborhood built environmental attributes:**

- residential density
- land use mix diversity
- distance to school
- land use mix access
- connectivity
- availability of walking and cycling infrastructure
- maintenance and quality of walking and cycling infrastructure
- safety for traffic
- safety for crime
- convenience of recreational facilities

$\tau'$

**Physical activity variables:**

- active transport to and from school
- walking for transport during leisure time
- cycling for transport during leisure time
- total physical activity level
- daily number of step counts

$\alpha$

Children's independent mobility

$\beta$
